# Supplementary material for: The impact of processing voltage of wire electric discharge machining on the performance of Mo doped V–VO0.2 based Archimedean micro-supercapacitors
Source: Royal Society of Chemistry journal article supplement (doi:10.1039/d4ra04909h), 2024-01-01
Supplement: d4ra04909h1.pdf [file d4ra04909h1.pdf]

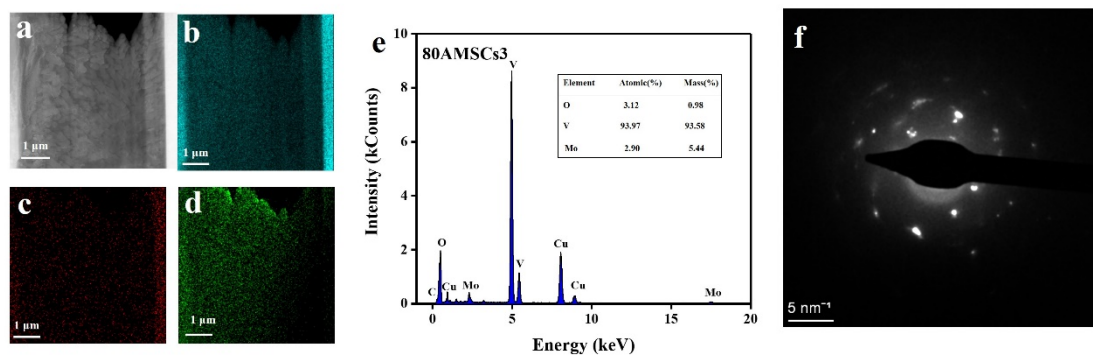

Fig.1S (a) TEM morphology of Mo@V-VO<sub>0.2</sub> based 80AMSCs3 and the corresponding element mapping of (b) V, (c) Mo, and (d) O, (e) EDX spectrum, (f) SAED pattern.

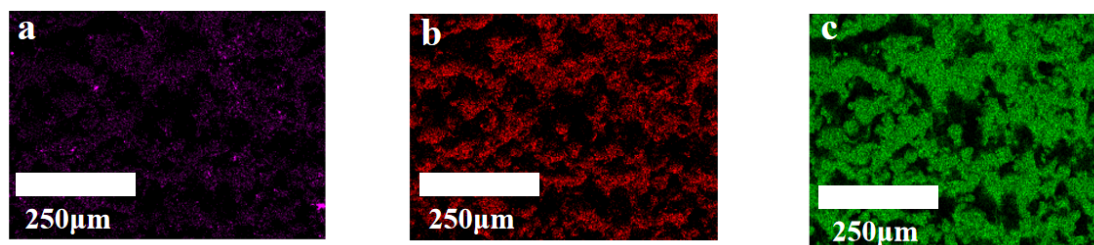

Fig.2S EDS element mapping for (a)Mo, (b)V and (c)O.

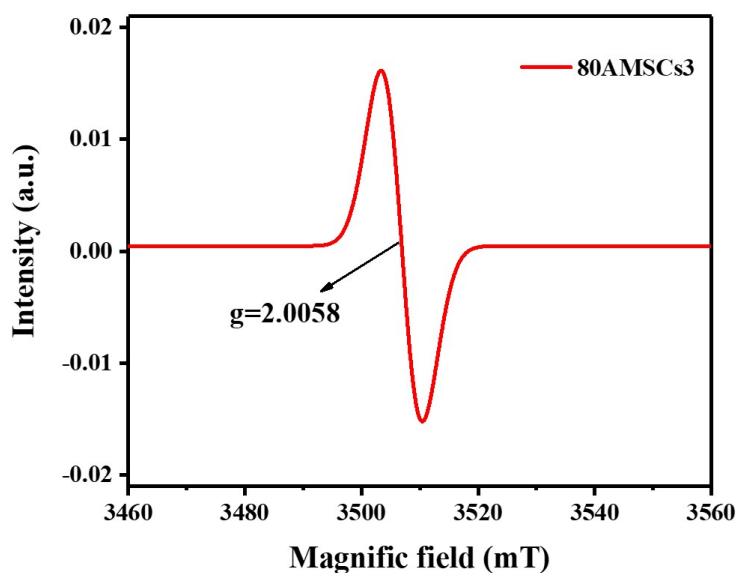

Fig. 3S EPR spectra of the 80AMSCs3.

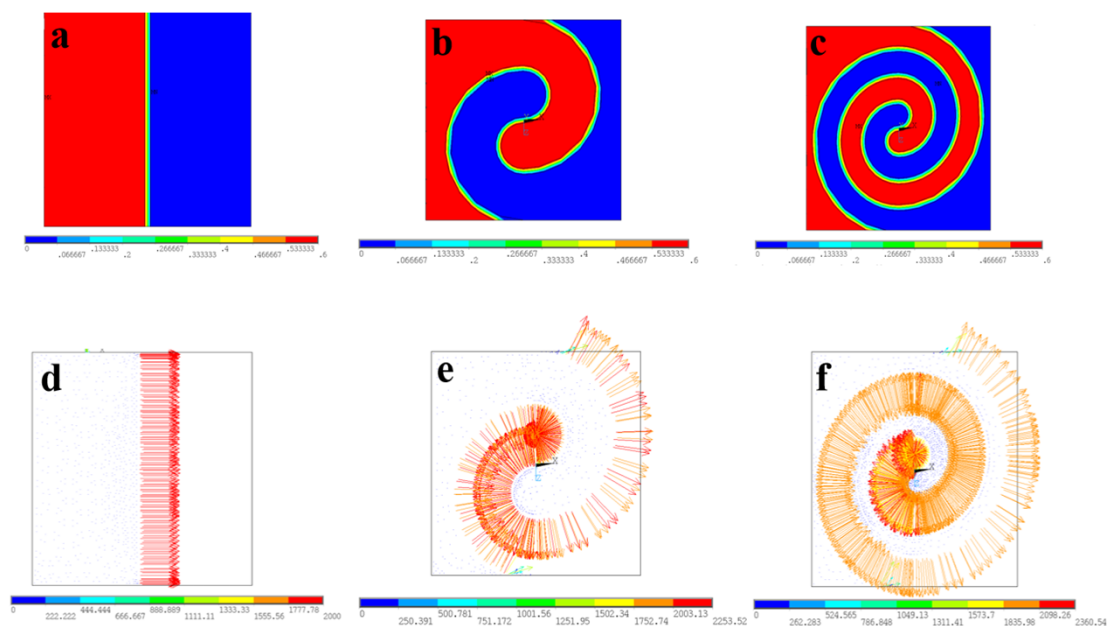

Fig.4S Electric potential distribution of (a) 60AMSCs1 and (b) 60AMSCs2, (c) and 60AMSCs3, electric field intensity distribution of (d) 60AMSCs1 and (e) 60AMSCs2 and (f) 60AMSCs3.

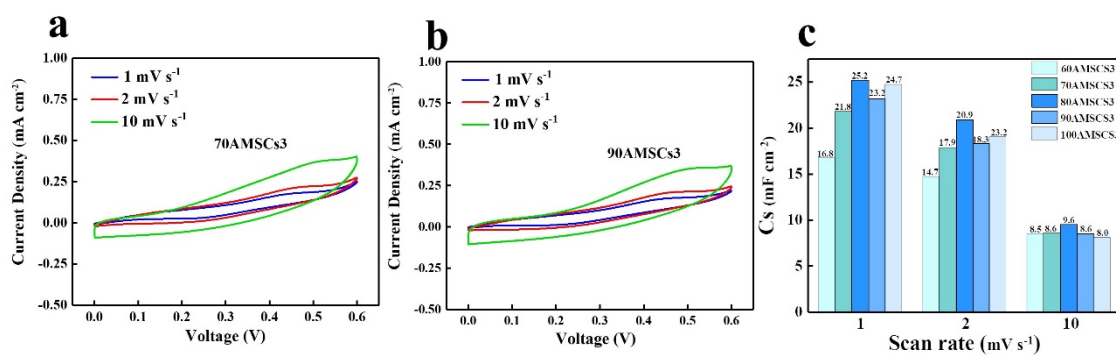

Fig.5S CVs at low scan rates of 1, 2 and 10 mV s<sup>-1</sup> for (a) 70AMSCs3 and (b) 90AMSCs3, and (c) areal capacitance of 60AMSCs3, 70AMSCs3, 80AMSCs3, 90AMSCs3 and 100AMSCs3 at different scan rates.

Table.1S Comparison of MSCs fabricated by different processing methods

| Devices                            | Electrodes Fabricated Techniques Used                                                                                   | Materials used for Electrodes Fabrication                                                                                                                                                                                                              | Current collectors                                | Capacitance (mF cm <sup>-2</sup> ) | References |
|------------------------------------|-------------------------------------------------------------------------------------------------------------------------|--------------------------------------------------------------------------------------------------------------------------------------------------------------------------------------------------------------------------------------------------------|---------------------------------------------------|------------------------------------|------------|
| PANI/V <sub>2</sub> O <sub>5</sub> | Electrodeposition<br>Spray coating<br>Solvothermal method,<br>Centrifugation,<br>Pyrolysis,<br>Annealing,<br>Dispersing | VCl <sub>3</sub> , p-benzenedicarboxylic acid, ethanol, N <sub>2</sub> gas, Ar-H <sub>2</sub> gas, dimethylformamide, isopropanol, aniline, H <sub>2</sub> SO <sub>4</sub> , SnO <sub>2</sub> : F (FTO)                                                | FTO prepared by coating                           | 12.3                               | [1]        |
| rGO/V <sub>2</sub> O <sub>5</sub>  | Spray coating,<br>Sputtering,<br>Modified Hummer's method, Annealing,<br>Stirring,<br>Ultrasonication,<br>Filtering     | N <sub>2</sub> gas, NH <sub>4</sub> VO <sub>3</sub> , Ammonium hydroxide, C <sub>2</sub> H <sub>5</sub> NS, ethanol, dimethylformamide, graphite powder, H <sub>2</sub> SO <sub>4</sub> , ice, KMnO <sub>4</sub> , H <sub>2</sub> O <sub>2</sub> , HCl | Au/Cr current collectors fabricated by Sputtering | 24                                 | [2]        |
| Graphene-PEDOT-PSS                 | Mask-assisted spray deposition,<br>Electrochemically exfoliating,<br>Stirring,<br>Heating,<br>Sonication                | Graphite foil, N <sub>2</sub> gas, H <sub>2</sub> SO <sub>4</sub> , 2-propanol, PEDOT, PSS, platinum                                                                                                                                                   | Integrated electrodes                             | 5.4                                | [3]        |
| MXene                              | Laser machining<br>Spray-coating,<br>Etching,<br>Stirring,<br>Centrifugation,<br>Filtering                              | Ti <sub>3</sub> AlC <sub>2</sub> , HF, LiF, HCl                                                                                                                                                                                                        | Integrated electrodes                             | 23                                 | [4]        |
| CNT                                | Spin coating,<br>Photolithography,<br>Ultrasonication,<br>Stirring,<br>Centrifugation,<br>Drying,<br>Pyrolysis          | CNTs, chitosan, acetic acid, ammonia, formalin, photoresist, Si/SiO <sub>2</sub> wafer, N <sub>2</sub> gas                                                                                                                                             | Integrated electrodes                             | 6.1                                | [5]        |

|                      |                                                                                                     |                                                                                                                                                                                               |                               |      |                  |
|----------------------|-----------------------------------------------------------------------------------------------------|-----------------------------------------------------------------------------------------------------------------------------------------------------------------------------------------------|-------------------------------|------|------------------|
|                      | baking                                                                                              |                                                                                                                                                                                               |                               |      |                  |
| Activated carbon     | Inkjet printing, Photolithography, Chemical vapour deposition, Evaporation, Etching                 | Activated carbon powder, polytetrafluoroethylene binder, Triton X100, ethylene glycol, titanium, gold                                                                                         | Gold current collector        | 5.1  | [6]              |
| Carbon onions        | Electrophoretic deposition, Photolithography, Etching, Thermal growing, Annealing, Heating          | Nanodiamond, titanium, gold, HClO <sub>4</sub> , ethanol-water, silicon dioxide, MgCl <sub>2</sub>                                                                                            | Gold current collector        | 1.7  | [7]              |
| Graphene             | Spin coating, Lithography, O <sub>2</sub> plasma treatment, CH <sub>4</sub> plasma treatment        | Graphene oxide, O <sub>2</sub> , CH <sub>4</sub> , photoresist, Au, KI/I <sub>2</sub> solution                                                                                                | Gold current collector        | 0.08 | [8]              |
| Graphene             | Laser-scribing, Modified Hummer's method, Stirring, Drop-cast                                       | Graphite powder, H <sub>2</sub> SO <sub>4</sub> , K <sub>2</sub> S <sub>2</sub> O <sub>8</sub> , P <sub>2</sub> O <sub>5</sub> , KMnO <sub>4</sub> , H <sub>2</sub> O <sub>2</sub> , HCl      | Integrated electrodes         | 2.3  | [9]              |
| rGO                  | Laser radiation, Vacuum filtration, Modified Hummer's method, Stirring, Filtering, Washing, Heating | Graphite powder, H <sub>2</sub> SO <sub>4</sub> , K <sub>2</sub> S <sub>2</sub> O <sub>8</sub> , P <sub>2</sub> O <sub>5</sub> , ice, KMnO <sub>4</sub> , H <sub>2</sub> O <sub>2</sub> , HCl | Carbon-coated aluminium foils | 0.51 | [10]             |
| Mo@VO <sub>0.2</sub> | WEDM                                                                                                | Vanadium metal sheet, Molybdenum wire                                                                                                                                                         | Integrated electrodes         | 25.2 | <b>This work</b> |

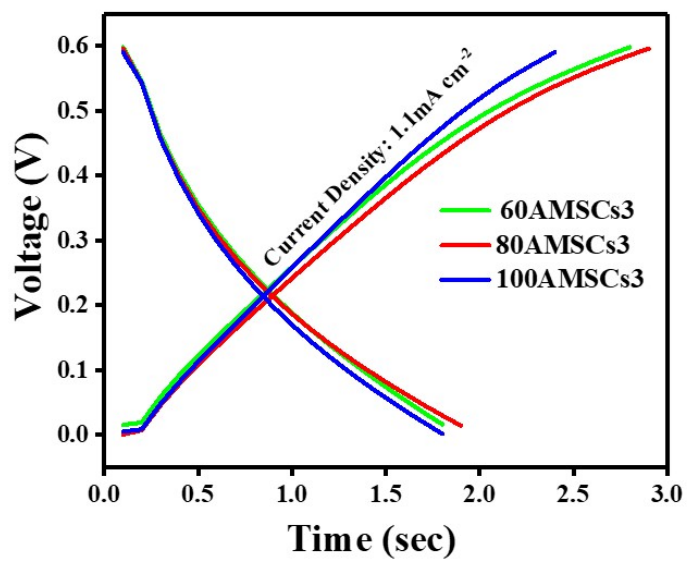

Fig. 6S The GCD images of 60AMSCs3, 80AMSCs3 and 100AMSCs3.

## References

- [1] A. Dewan, R. Narayanan, M. O. Thotiyl, A multi-chromic supercapacitor of high coloration efficiency integrating a MOF-derived  $V_2O_5$  electrode, *Nanoscale* 14(46) (2022) 17372–17384.
- [2] B. D. Boruah, S. Nandi, A. Misra, Layered assembly of reduced graphene oxide and vanadium oxide heterostructure supercapacitor electrodes with larger surface area for efficient energy-storage performance, *ACS Applied Energy Materials* 1(4) (2018) 1567–1574.
- [3] Z. Liu, Z. S. Wu, S. Yang, R. Dong, X. Feng, K. Müllen, Ultraflexible in-plane micro-supercapacitors by direct printing of solution-processable electrochemically exfoliated graphene, *Advanced Materials* 28(11) (2016) 2217–2222.
- [4] Q. Jiang, C. Wu, Z. Wang, A. C. Wang, J. H. He, Z. L. Wang, H. N. Alshareef, MXene electrochemical micro-supercapacitor integrated with triboelectric nanogenerator as a wearable self-charging power unit, *Nano Energy* 45 (2018) 266–272.
- [5] Y. Yang, L. He, C. Tang, P. Hu, X. Hong, M. Yan, Y. Dong, X. Tian, Q. Wei, L. Mai, Improved conductivity and capacitance of interdigital carbon microelectrodes through integration with carbon nanotubes for micro-supercapacitors, *Nano Research* 9 (2016) 2510–2519.
- [6] D. Pech, M. Brunet, P. L. Taberna, P. Simon, N. Fabre, F. Mesnilgrete, V. Conédéra, H. Durou, Elaboration of a microstructured inkjet-printed carbon electrochemical capacitor, *Journal of Power Sources* 195(4) (2010) 1266–1269.
- [7] D. Pech, M. Brunet, H. Durou, P. Huang, V. Mochalin, Y. Gogotsi, P. L. Taberna, P. Simon, Ultrahigh-power micrometre-sized supercapacitors based on onion-like carbon, *Nature nanotechnology* 5(9) (2010) 651–654.
- [8] Z. S. Wu, K. Parvez, X. Feng, K. Müllen, Graphene-based in-plane micro-supercapacitors with high power and energy densities, *Nature communications* 4(1) (2013) 2487.
- [9] M. F. El-Kady, R. B. Kaner, Scalable fabrication of high-power graphene micro-supercapacitors for flexible and on-chip energy storage, *Nature communications* 4(1) (2013) 1475.
- [10] W. Gao, N. Singh, L. Song, Z. Liu, A. L. M. Reddy, L. Ci, R. Vajtai, Q. Zhang, B. Wei, P.M. Ajayan, Direct laser writing of micro-supercapacitors on hydrated graphite oxide films, *Nature nanotechnology* 6(8) (2011) 496–500.
